# Supplementary material for: Racial/Ethnic Differences and Trends in Pathologic Complete Response Following Neoadjuvant Chemotherapy for Breast Cancer
Source: MDPI journal article supplement (doi:10.3390/cancers14030534), 2022-01-21
Supplement: s1 [file s1]

**Table S1. Baseline characteristics of all cohorts stratified by racial groups.**

|                 | NHW   |       | HW   |       | Black |       | API  |       |        |
|-----------------|-------|-------|------|-------|-------|-------|------|-------|--------|
| Variable        | N     | %     | N    | %     | N     | %     | N    | %     | P      |
| pCR             |       |       |      |       |       |       |      |       | <0.001 |
| No              | 56192 | 77.4  | 5779 | 75.7  | 15140 | 77.6  | 3288 | 74.8  |        |
| Yes             | 16439 | 22.6  | 1853 | 24.3  | 4365  | 22.4  | 1105 | 25.2  |        |
| Total           | 72631 | 100.0 | 7632 | 100.0 | 19505 | 100.0 | 4393 | 100.0 |        |
|                 |       |       |      |       |       |       |      |       |        |
| Facility        |       |       |      |       |       |       |      |       | <0.001 |
| Nonacademic     | 43333 | 59.7  | 3517 | 46.1  | 9751  | 50.0  | 2038 | 46.4  |        |
| Academic        | 19913 | 27.4  | 2534 | 33.2  | 6873  | 35.2  | 1521 | 34.6  |        |
| Not available   | 9385  | 12.9  | 1581 | 20.7  | 2881  | 14.8  | 834  | 19.0  |        |
| Total           | 72631 | 100.0 | 7632 | 100.0 | 19505 | 100.0 | 4393 | 100.0 |        |
|                 |       |       |      |       |       |       |      |       |        |
| Facility volume |       |       |      |       |       |       |      |       | <0.001 |
| Low             | 4697  | 6.5   | 360  | 4.7   | 776   | 4.0   | 243  | 5.5   |        |
| Int             | 14355 | 19.8  | 1446 | 18.9  | 3329  | 17.1  | 804  | 18.3  |        |
| High            | 53579 | 73.8  | 5826 | 76.3  | 15400 | 79.0  | 3346 | 76.2  |        |
| Total           | 72631 | 100.0 | 7632 | 100.0 | 19505 | 100.0 | 4393 | 100.0 |        |
|                 |       |       |      |       |       |       |      |       |        |
| Age             |       |       |      |       |       |       |      |       | <0.001 |
| <50             | 26753 | 36.8  | 4075 | 53.4  | 8058  | 41.3  | 2166 | 49.3  |        |
| 50-70           | 38821 | 53.4  | 3155 | 41.3  | 10125 | 51.9  | 1976 | 45.0  |        |
| >70             | 7057  | 9.7   | 402  | 5.3   | 1322  | 6.8   | 251  | 5.7   |        |
| Total           | 72631 | 100.0 | 7632 | 100.0 | 19505 | 100.0 | 4393 | 100.0 |        |
|                 |       |       |      |       |       |       |      |       |        |
| Insurance       |       |       |      |       |       |       |      |       | <0.001 |
| None            | 1460  | 2.0   | 1050 | 13.8  | 917   | 4.7   | 197  | 4.5   |        |
| Private         | 49013 | 67.5  | 3675 | 48.2  | 10892 | 55.8  | 3003 | 68.4  |        |
| Government      | 21410 | 29.5  | 2813 | 36.9  | 7454  | 38.2  | 1140 | 26.0  |        |
| Not available   | 748   | 1.0   | 94   | 1.2   | 242   | 1.2   | 53   | 1.2   |        |
| Total           | 72631 | 100.0 | 7632 | 100.0 | 19505 | 100.0 | 4393 | 100.0 |        |
|                 |       |       |      |       |       |       |      |       |        |
| Income          |       |       |      |       |       |       |      |       | <0.001 |
| Above median    | 42155 | 58.0  | 3410 | 44.7  | 6561  | 33.6  | 3080 | 70.1  |        |
| Below median    | 20552 | 28.3  | 3274 | 42.9  | 10207 | 52.3  | 743  | 16.9  |        |
| Not available   | 9924  | 13.7  | 948  | 12.4  | 2737  | 14.0  | 570  | 13.0  |        |

|                   |       |       |      |       |       |       |      |       |        |
|-------------------|-------|-------|------|-------|-------|-------|------|-------|--------|
| Total             | 72631 | 100.0 | 7632 | 100.0 | 19505 | 100.0 | 4393 | 100.0 |        |
|                   |       |       |      |       |       |       |      |       |        |
| Education         |       |       |      |       |       |       |      |       | <0.001 |
| Educated          | 39336 | 54.2  | 1831 | 24.0  | 5459  | 28.0  | 2261 | 51.5  |        |
| Uneducated        | 23481 | 32.3  | 4863 | 63.7  | 11327 | 58.1  | 1564 | 35.6  |        |
| Not available     | 9814  | 13.5  | 938  | 12.3  | 2719  | 13.9  | 568  | 12.9  |        |
| Total             | 72631 | 100.0 | 7632 | 100.0 | 19505 | 100.0 | 4393 | 100.0 |        |
|                   |       |       |      |       |       |       |      |       |        |
| Residence         |       |       |      |       |       |       |      |       | <0.001 |
| Metro             | 60167 | 82.8  | 7206 | 94.4  | 17790 | 91.2  | 4171 | 94.9  |        |
| Urban             | 9301  | 12.8  | 307  | 4.0   | 1155  | 5.9   | 114  | 2.6   |        |
| Rural             | 1184  | 1.6   | 17   | 0.2   | 158   | 0.8   | 5    | 0.1   |        |
| Not available     | 1979  | 2.7   | 102  | 1.3   | 402   | 2.1   | 103  | 2.3   |        |
| Total             | 72631 | 100.0 | 7632 | 100.0 | 19505 | 100.0 | 4393 | 100.0 |        |
|                   |       |       |      |       |       |       |      |       |        |
| CDS               |       |       |      |       |       |       |      |       | <0.001 |
| 0                 | 64103 | 88.3  | 6693 | 87.7  | 16089 | 82.5  | 3932 | 89.5  |        |
| 1                 | 6888  | 9.5   | 803  | 10.5  | 2689  | 13.8  | 397  | 9.0   |        |
| 2+                | 1640  | 2.3   | 136  | 1.8   | 727   | 3.7   | 64   | 1.5   |        |
| Total             | 72631 | 100.0 | 7632 | 100.0 | 19505 | 100.0 | 4393 | 100.0 |        |
|                   |       |       |      |       |       |       |      |       |        |
| Year of diagnosis |       |       |      |       |       |       |      |       | <0.001 |
| 2010-2013         | 31250 | 43.0  | 3130 | 41.0  | 8226  | 42.2  | 1685 | 38.4  |        |
| 2014-2017         | 41381 | 57.0  | 4502 | 59.0  | 11279 | 57.8  | 2708 | 61.6  |        |
| Total             | 72631 | 100.0 | 7632 | 100.0 | 19505 | 100.0 | 4393 | 100.0 |        |
|                   |       |       |      |       |       |       |      |       |        |
| Histology         |       |       |      |       |       |       |      |       | <0.001 |
| Ductal            | 57526 | 79.2  | 6305 | 82.6  | 16210 | 83.1  | 3632 | 82.7  |        |
| Lobular           | 4617  | 6.4   | 334  | 4.4   | 657   | 3.4   | 140  | 3.2   |        |
| Others            | 10488 | 14.4  | 993  | 13.0  | 2638  | 13.5  | 621  | 14.1  |        |
| Total             | 72631 | 100.0 | 7632 | 100.0 | 19505 | 100.0 | 4393 | 100.0 |        |
|                   |       |       |      |       |       |       |      |       |        |
| Grade             |       |       |      |       |       |       |      |       | <0.001 |
| Well diff         | 3908  | 5.4   | 350  | 4.6   | 589   | 3.0   | 180  | 4.1   |        |
| Moderately diff   | 22941 | 31.6  | 2236 | 29.3  | 4518  | 23.2  | 1328 | 30.2  |        |
| Poorly diff       | 40582 | 55.9  | 4514 | 59.1  | 13055 | 66.9  | 2568 | 58.5  |        |
| Others            | 214   | 0.3   | 24   | 0.3   | 67    | 0.3   | 17   | 0.4   |        |
| Not available     | 4986  | 6.9   | 508  | 6.7   | 1276  | 6.5   | 300  | 6.8   |        |

|               |       |       |      |       |       |       |      |       |        |
|---------------|-------|-------|------|-------|-------|-------|------|-------|--------|
| Total         | 72631 | 100.0 | 7632 | 100.0 | 19505 | 100.0 | 4393 | 100.0 |        |
|               |       |       |      |       |       |       |      |       |        |
| cT            |       |       |      |       |       |       |      |       | <0.001 |
| 1             | 14019 | 19.3  | 1184 | 15.5  | 3430  | 17.6  | 634  | 14.4  |        |
| 2             | 38261 | 52.7  | 4099 | 53.7  | 10065 | 51.6  | 2537 | 57.8  |        |
| 3             | 14618 | 20.1  | 1777 | 23.3  | 4280  | 21.9  | 877  | 20.0  |        |
| 4             | 5733  | 7.9   | 572  | 7.5   | 1730  | 8.9   | 345  | 7.9   |        |
| Total         | 72631 | 100.0 | 7632 | 100.0 | 19505 | 100.0 | 4393 | 100.0 |        |
|               |       |       |      |       |       |       |      |       |        |
| cN            |       |       |      |       |       |       |      |       | <0.001 |
| 0             | 33836 | 46.6  | 3141 | 41.2  | 7733  | 39.6  | 1972 | 44.9  |        |
| 1             | 30748 | 42.3  | 3430 | 44.9  | 8963  | 46.0  | 1943 | 44.2  |        |
| 2             | 4974  | 6.8   | 642  | 8.4   | 1716  | 8.8   | 284  | 6.5   |        |
| 3             | 3073  | 4.2   | 419  | 5.5   | 1093  | 5.6   | 194  | 4.4   |        |
| Total         | 72631 | 100.0 | 7632 | 100.0 | 19505 | 100.0 | 4393 | 100.0 |        |
|               |       |       |      |       |       |       |      |       |        |
| HR            |       |       |      |       |       |       |      |       | <0.001 |
| HR+/HER2-     | 31779 | 43.8  | 3398 | 44.5  | 7060  | 36.2  | 1870 | 42.6  |        |
| HR-/HER2+     | 10220 | 14.1  | 1049 | 13.7  | 2350  | 12.0  | 853  | 19.4  |        |
| HR+/HER2+     | 7630  | 10.5  | 747  | 9.8   | 1503  | 7.7   | 505  | 11.5  |        |
| HR-/HER2-     | 23002 | 31.7  | 2438 | 31.9  | 8592  | 44.1  | 1165 | 26.5  |        |
| Total         | 72631 | 100.0 | 7632 | 100.0 | 19505 | 100.0 | 4393 | 100.0 |        |
|               |       |       |      |       |       |       |      |       |        |
| Surgery       |       |       |      |       |       |       |      |       | <0.001 |
| Lumpectomy    | 26002 | 35.8  | 2684 | 35.2  | 8031  | 41.2  | 1571 | 35.8  |        |
| Mastectomy    | 46571 | 64.1  | 4943 | 64.8  | 11465 | 58.8  | 2818 | 64.1  |        |
| Others        | 58    | 0.1   | 5    | 0.1   | 9     | 0.0   | 4    | 0.1   |        |
| Total         | 72631 | 100.0 | 7632 | 100.0 | 19505 | 100.0 | 4393 | 100.0 |        |
|               |       |       |      |       |       |       |      |       |        |
| Margin        |       |       |      |       |       |       |      |       | 0.40   |
| Negative      | 68701 | 94.6  | 7182 | 94.1  | 18424 | 94.5  | 4148 | 94.4  |        |
| Positive      | 3007  | 4.1   | 335  | 4.4   | 829   | 4.3   | 196  | 4.5   |        |
| Not available | 923   | 1.3   | 115  | 1.5   | 252   | 1.3   | 49   | 1.1   |        |
| Total         | 72631 | 100.0 | 7632 | 100.0 | 19505 | 100.0 | 4393 | 100.0 |        |
|               |       |       |      |       |       |       |      |       |        |
| LVSI          |       |       |      |       |       |       |      |       | <0.001 |
| No            | 38889 | 53.5  | 3934 | 51.5  | 10183 | 52.2  | 2287 | 52.1  |        |
| Yes           | 15346 | 21.1  | 1663 | 21.8  | 3781  | 19.4  | 907  | 20.6  |        |
| Not available | 18396 | 25.3  | 2035 | 26.7  | 5541  | 28.4  | 1199 | 27.3  |        |

[illegible]

|                               |       |       |      |       |       |       |      |       |        |
|-------------------------------|-------|-------|------|-------|-------|-------|------|-------|--------|
| Adjuvant therapy              |       |       |      |       |       |       |      |       | <0.001 |
| No                            | 42938 | 59.1  | 4574 | 59.9  | 12786 | 65.6  | 2455 | 55.9  |        |
| Yes                           | 29693 | 40.9  | 3058 | 40.1  | 6719  | 34.4  | 1938 | 44.1  |        |
| Total                         | 72631 | 100.0 | 7632 | 100.0 | 19505 | 100.0 | 4393 | 100.0 |        |
|                               |       |       |      |       |       |       |      |       |        |
| Time between dx and NACT      |       |       |      |       |       |       |      |       | <0.001 |
| 0-30 days                     | 37910 | 52.2  | 2724 | 35.7  | 7345  | 37.7  | 1998 | 45.5  |        |
| >30 days                      | 34721 | 47.8  | 4908 | 64.3  | 12160 | 62.3  | 2395 | 54.5  |        |
| Total                         | 72631 | 100.0 | 7632 | 100.0 | 19505 | 100.0 | 4393 | 100.0 |        |
|                               |       |       |      |       |       |       |      |       |        |
| Time between NACT and surgery |       |       |      |       |       |       |      |       | <0.001 |
| 0-150 days                    | 36432 | 50.2  | 3246 | 42.5  | 8715  | 44.7  | 2078 | 47.3  |        |
| >150 days                     | 36199 | 49.8  | 4386 | 57.5  | 10790 | 55.3  | 2315 | 52.7  |        |
| Total                         | 72631 | 100.0 | 7632 | 100.0 | 19505 | 100.0 | 4393 | 100.0 |        |

NHW: non-Hispanic White; HW: Hispanic White; API: Asian and Pacific Islander; N: number; pCR: pathologic complete response; Int: intermediate; CDS: Charlson-Deyo comorbidity score; diff: differentiated; HR: hormone receptor; HER2: human epidermal growth factor receptor 2; LVSI: lymphovascular space invasion; RT: radiation therapy; Chemo: chemotherapy; dx: diagnosis; NACT: neoadjuvant chemotherapy.

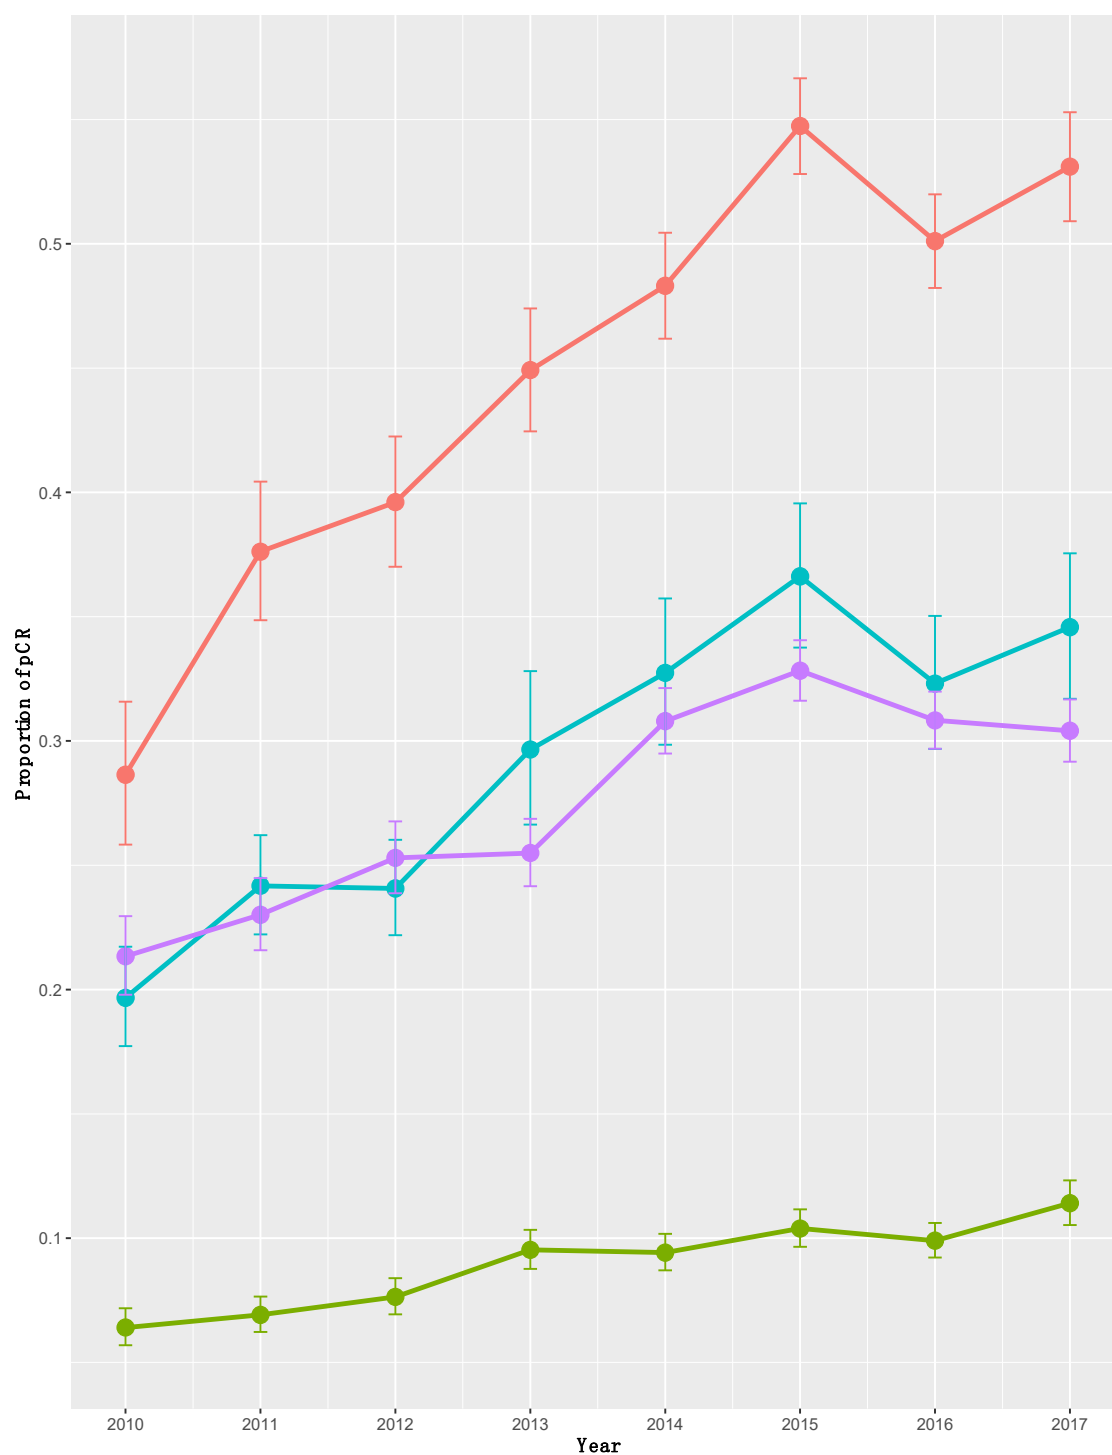

**Figure S1. Trends in proportion of pathologic complete response from 2010 to 2017 stratified by tumor receptor subtypes.** Orange: HR-HER2+; cyan: HR+HER2+; purple: HR-HER2-; green: HR+HER2-. Error bar represents 95% confidence interval. pCR: pathologic complete response; HR: hormone receptor; HER2: human epidermal growth factor receptor 2.

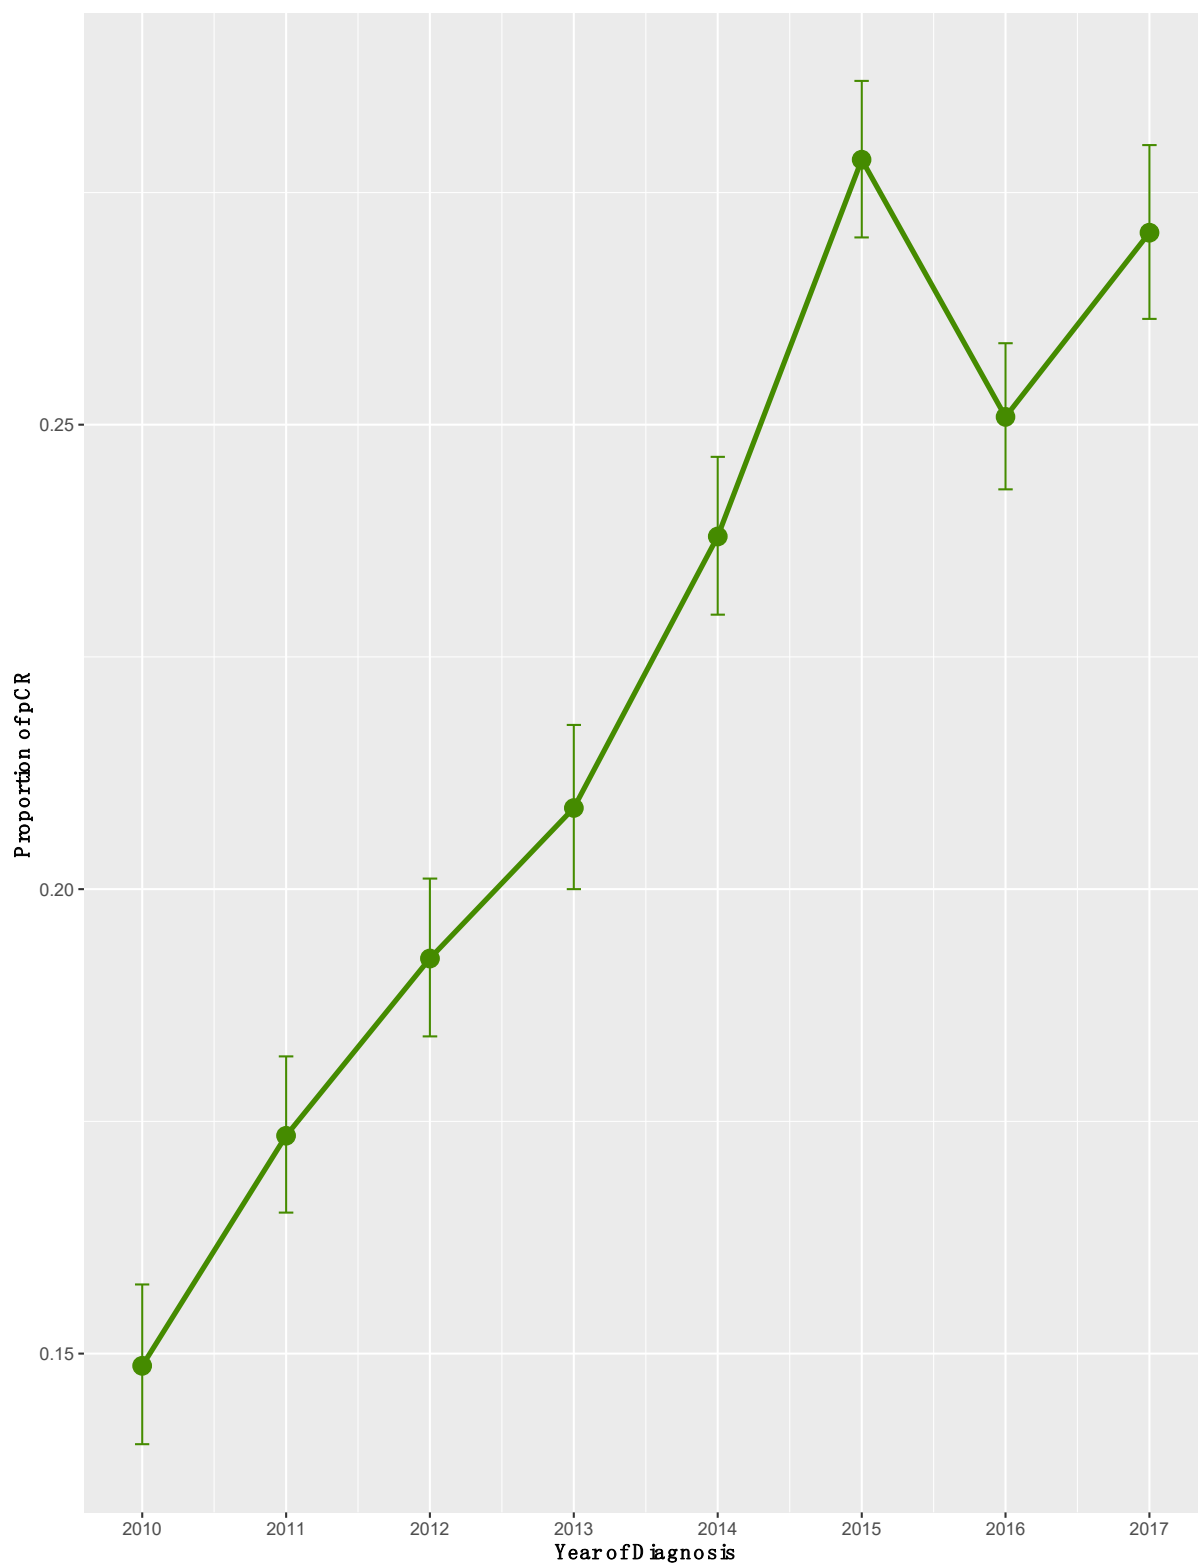

**Figure S2. Trends in proportion of pathologic complete response from 2010 to 2017 for non-Hispanic White women.** Error bar represents 95% confidence interval.

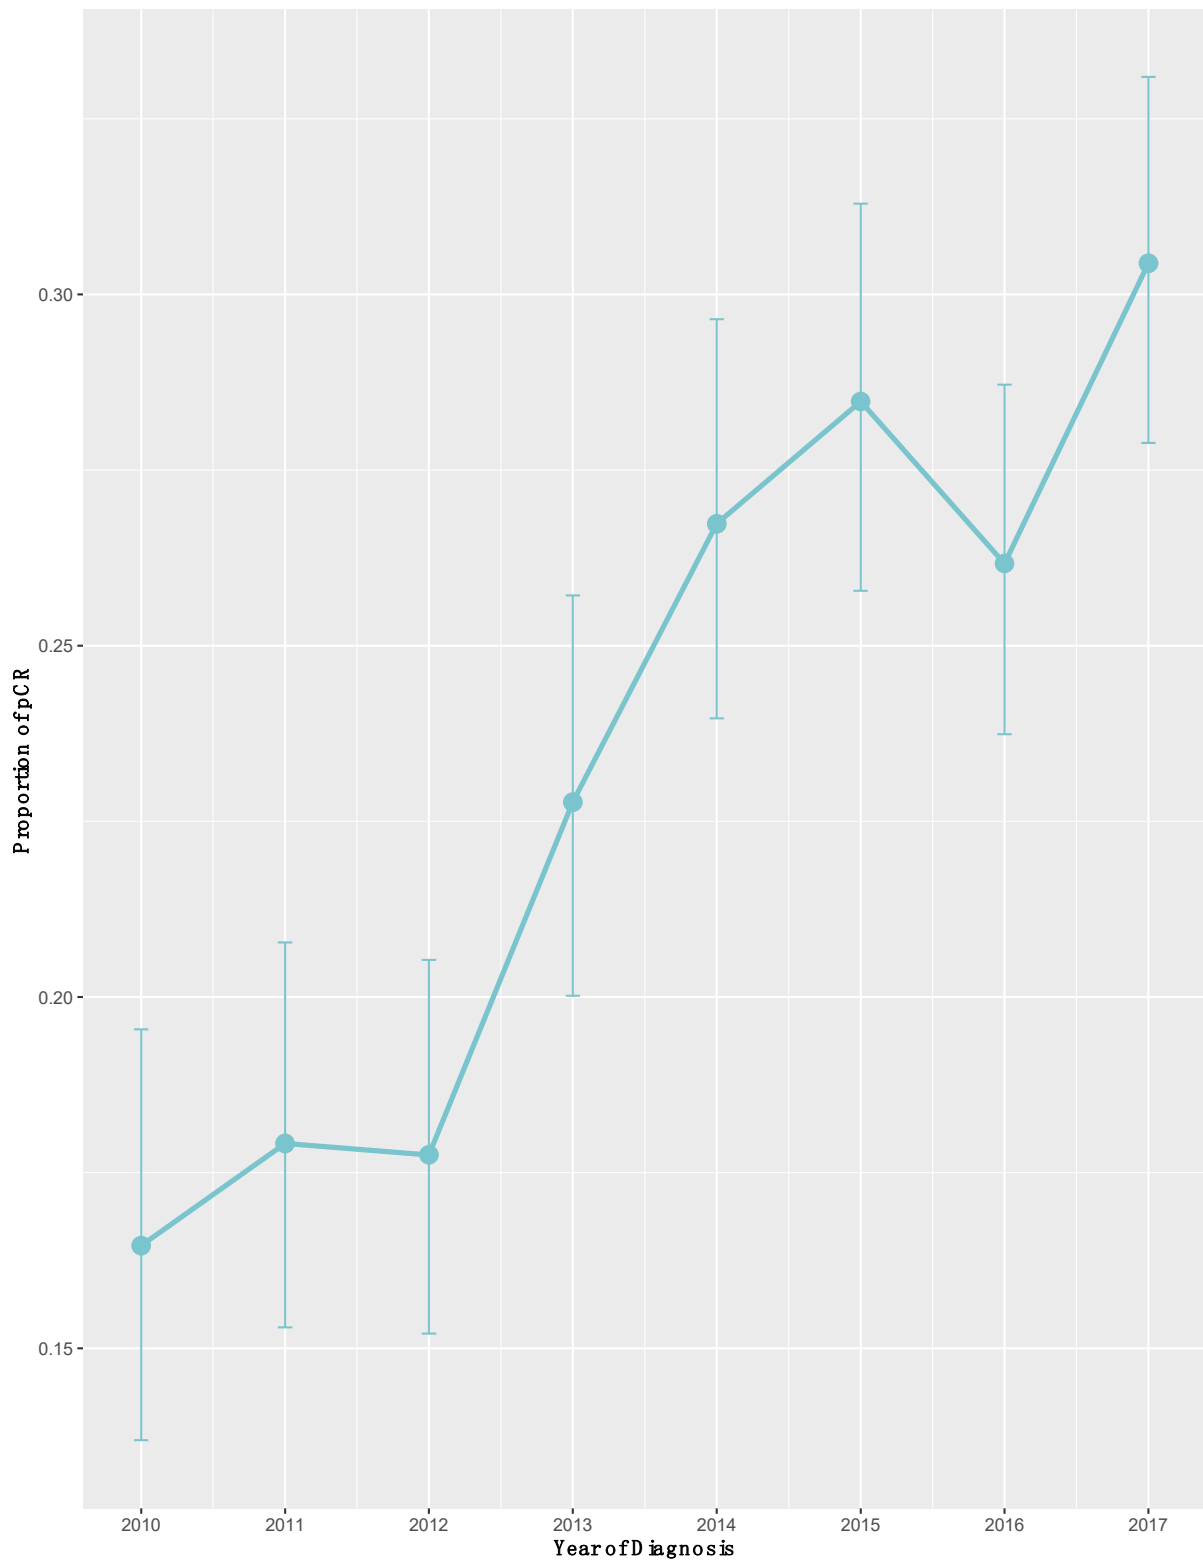

**Figure S3. Trends in proportion of pathologic complete response from 2010 to 2017 for Hispanic White women.** Error bar represents 95% confidence interval.

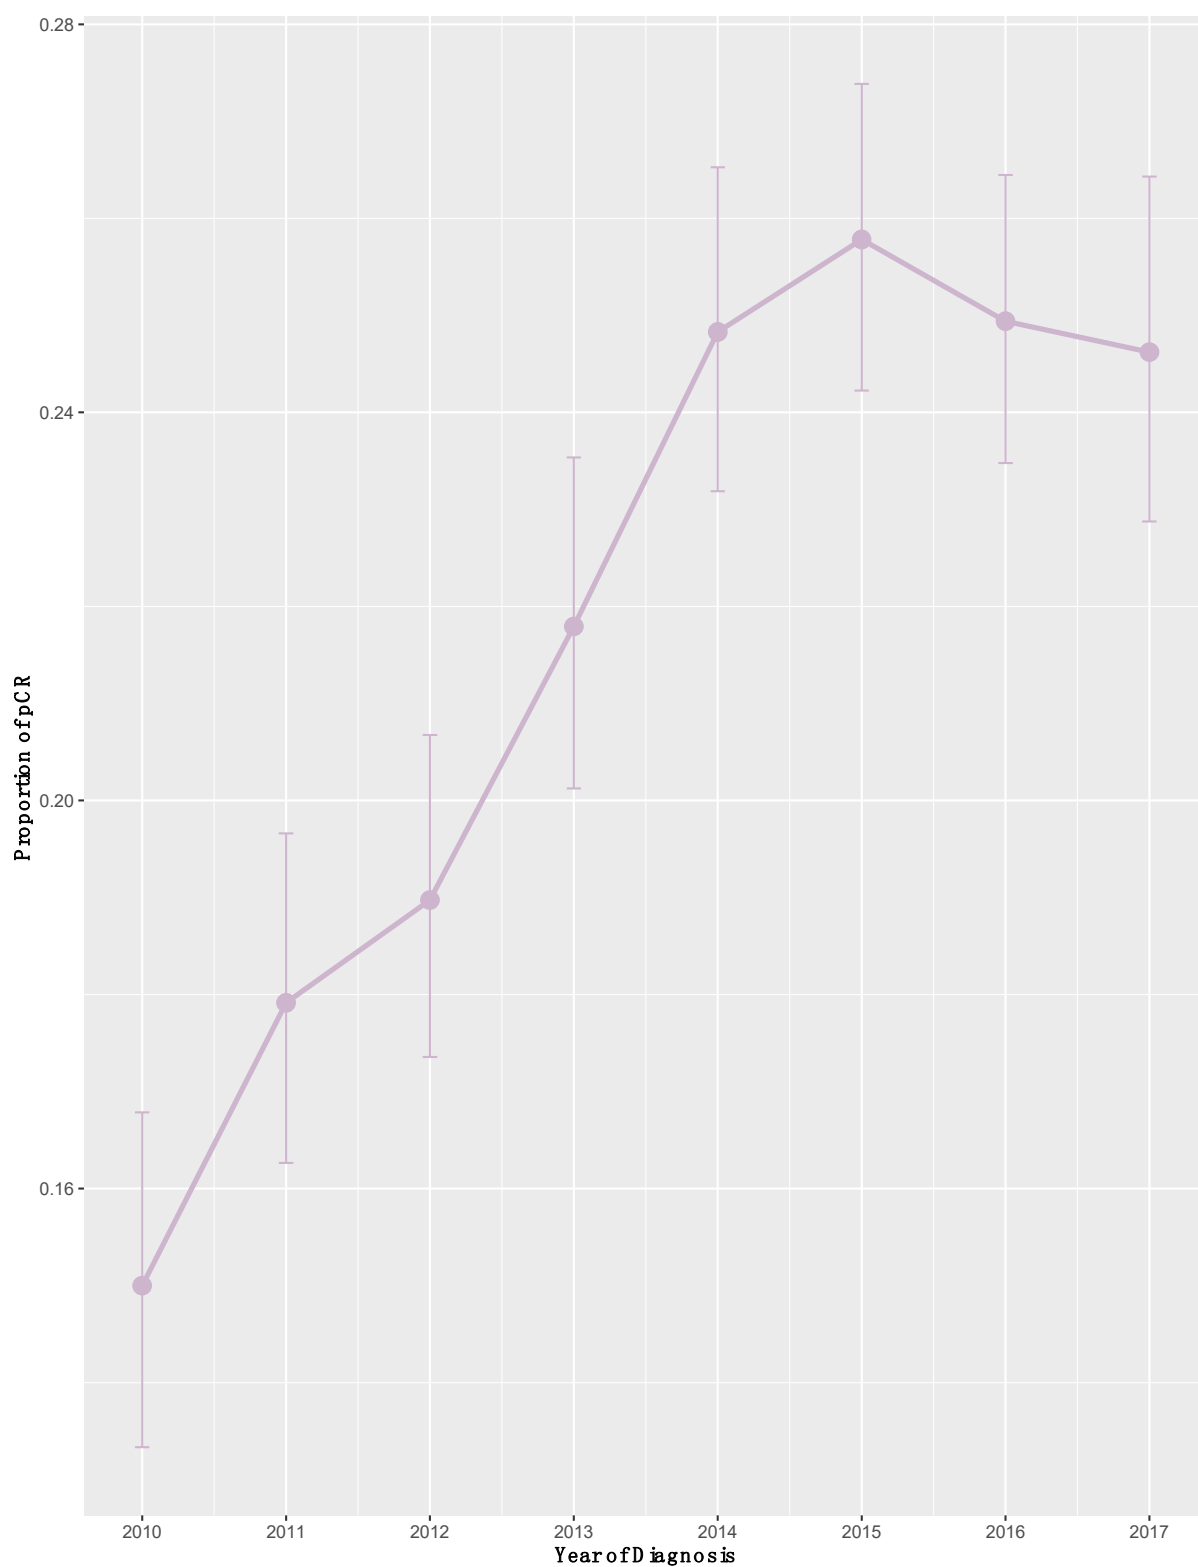

**Figure S4. Trends in proportion of pathologic complete response from 2010 to 2017 for Black women. Error bar represents 95% confidence interval.**

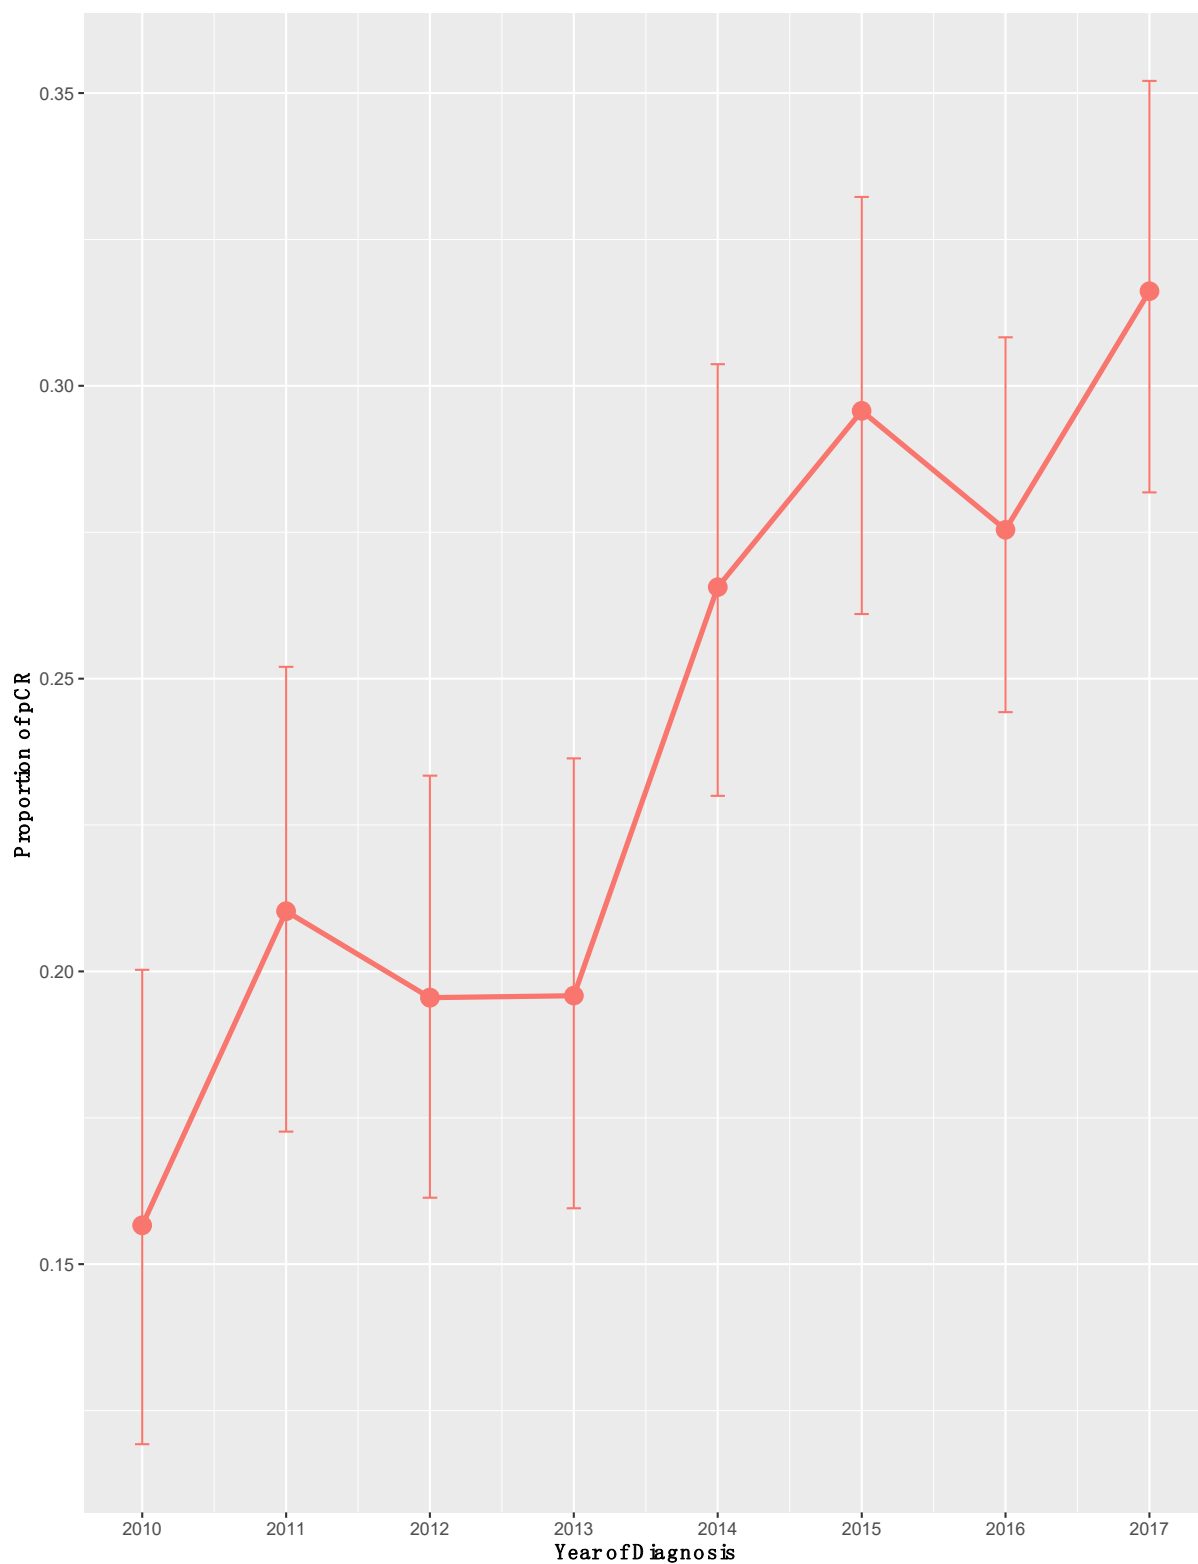

**Figure S5. Trends in proportion of pathologic complete response from 2010 to 2017 for Asian or Pacific Islander women. Error bar represents 95% confidence interval.**
